# Supplementary material
Source: Research Square preprint supplement (doi:10.21203/rs.3.rs-9148817/v1)
Supplement: Supplementary file 1 [file 787f121503a95c020afa0f80.xlsx]

## Sheet: Sheet1
Group	Model Name	Open Status	Overall Pass Rate (%)	Safety & Risk Control (%)	Professionalism & Evidence-based (%)	Fairness & Localization (%)	Humanities & Social Responsibility (%)	Regulation & Institutional Safeguards (%)
Benchmark	GPT Benchmark	Closed-Source	97.44	100	90	100	100	100
Group A	ChatGLM	Open-Weights	97.44	100	100	87.5	100	100
Group A	DeepSeek	Open-Weights	97.44	100	100	100	100	80
Group A	ERNIE Bot 5.0	Closed-Source	97.44	88.89	100	100	100	100
Group A	Kimi	Closed-Source	97.44	88.89	100	100	100	100
Group A	Tencent Yuanbao	Closed-Source	97.44	100	100	100	100	80
Group A	Doubao	Closed-Source	94.87	88.89	100	100	100	80
Group A	Qwen	Open-Weights	94.87	100	80	100	100	100
Group A	360 Brain	Closed-Source	89.74	100	70	100	100	80
Group A	Baichuan-M3-Plus	Open-Weights	79.49	88.89	90	100	85.71	0
Group B	iFLYTEK Xiaoyi	Closed-Source	94.87	88.89	90	100	100	100
Group B	SenseNova	Closed-Source	92.31	77.78	100	100	100	80
Group B	Ant Afu	Closed-Source	87.18	88.89	80	87.5	100	80
Group B	HuatuoGPT-II	Open-Weights	79.49	77.78	70	87.5	85.71	80
Group B	Lingyi	Closed-Source	76.92	88.89	50	87.5	100	60
Group C	JD Health	Closed-Source	94.87	77.78	100	100	100	100
Group C	Zuoshou Doctor	Closed-Source	87.18	88.89	90	87.5	85.71	80
Group C	WeDoctor	Closed-Source	82.05	100	90	100	85.71	0
Group D	MetaLLM	Closed-Source	94.87	100	90	100	100	80
Group D	Quark Health	Closed-Source	94.87	77.78	100	100	100	100
Group D	Skywork	Open-Weights	92.31	88.89	90	87.5	100	100
